# Supplementary material for: Building Trust and Awareness to Increase AZ Native Nation Participation in COVID-19 Vaccines
Source: MDPI journal article supplement (doi:10.3390/ijerph20010031), 2022-12-20

# COVID-19 VACCINE INFORMATION

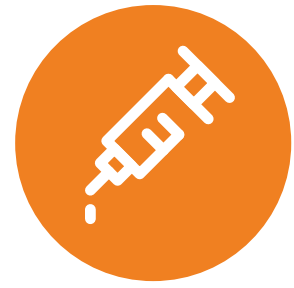

## WHAT IS THE COVID-19 VACCINE?

- The COVID-19 vaccine teaches your immune system to recognize and fight the virus that causes COVID-19.
- It creates a protein that builds antibodies to protect us from COVID-19.
- The COVID-19 vaccine **DOES NOT** contain the COVID-19 virus and it **DOES NOT** affect or interact with your DNA in any way.

To schedule a  
vaccine appointment:  
(928) 669-3246

## ARE THE VACCINES SAFE?

- The development of COVID-19 vaccines in a short amount of time was possible because of a global community of scientists working together.
- Clinical trials show that the benefits of taking the vaccine outweigh the health risks of COVID-19.
- The vaccine is safe for people of all racial and ethnic groups. People with chronic conditions were also included in trials.
- Every study, every phase, and every trial for the vaccine was reviewed by the U.S Food and Drug Administration (FDA) and a safety board.
- The FDA has granted emergency use authorization of the COVID-19 vaccines, which are safe and effective.

## HOW CAN YOU BENEFIT FROM THE VACCINE?

- Will lessen infectious time for fully vaccinated people than unvaccinated people from the Delta variant.
- Will provide strong protection against serious illness from the Delta variant.
- Will keep you from getting really sick from COVID-19.
- Will be a safe way to build protection.
- Will help everyone get back to normal and to their daily routines.
- Will be an important tool to help stop the pandemic.
- Will make sure the vaccines and/or treatments will work for as many people as possible.

# COVID-19 Vaccines Available

## Pfizer-BioNTech

  
95% effective

  
2 doses

  
21 days apart

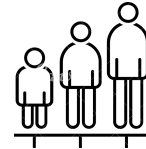

Recommended  
for people 12  
years and older\*

## Moderna

  
94% effective

  
2 doses

  
28 days apart

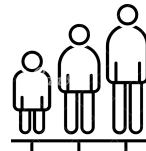

Recommended  
for people 18  
years and older\*

After you receive a dose of the the COVID-19 vaccine, you may experience a few side effects. These side effects are normal and may last a few days.\*

*\*if you experience symptoms longer than 2 days, please contact your healthcare provider*

In the arm  
where you got  
the vaccine:

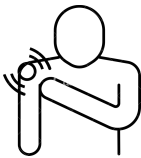

Pain

Swelling

Redness

Throughout  
the rest of  
your body:

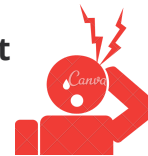

Chills

Tiredness

Headaches

## TIPS

**To reduce pain or discomfort where you got the vaccine:**

1. Apply a clean, cool, wet washcloth over the area
2. Use or exercise your arm

**To reduce discomfort from fever:**

1. Drink plenty of fluids and dress lightly
2. Talk to a healthcare provider about taking any over-the-counter pain medication

## REMINDER

It takes time for your body  
to build protection after  
any vaccination. The  
COVID-19 vaccines require  
1-2 weeks to provide  
protection.

*\*Vaccination is recommended for people who are pregnant, breastfeeding,  
and trying to get pregnant now or in the future.*

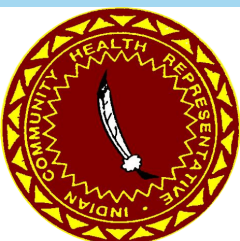

Parker Indian Health Center is offering COVID-19 Vaccines  
every Monday and Tuesday from 9:00 a.m. to 12:00 noon.

Moderna (ages 18 and over): 1st or 2nd dose (Mondays)  
Pfizer (ages 12 and over): 1st or 2nd dose (Tuesdays)

**\*\*attention CRIT elders and homebound adults\*\***

If you want a COVID-19 vaccine but have challenges in getting to the IHS vaccine clinics, call  
the CRIT CHRs at (928) 575-4431.

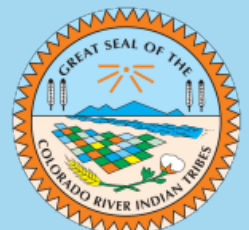

Supplement: s1 [file s1]
