# Supplementary material for: Building Trust and Awareness to Increase AZ Native Nation Participation in COVID-19 Vaccines
Source: Int J Environ Res Public Health. 2022 Dec 20;20(1):31. doi: 10.3390/ijerph20010031 (PMC9819330; doi:10.3390/ijerph20010031)
Supplement: Supplementary file 1 [file ijerph-20-00031-s001.zip]

Archive with 10 entries (10 files):
- Handout S1.pdf
- Handout S10.pdf
- Handout S2.pdf
- Handout S3.pdf
- Handout S4.pdf
- Handout S5.pdf
- Handout S6.pdf
- Handout S7.pdf
- Handout S8.pdf
- Handout S9.pdf
